# Supplementary material for: Perinatal foodborne titanium dioxide exposure-mediated dysbiosis predisposes mice to develop colitis through life
Source: PubMed Central journal article supplement (PMC10666382; doi:10.1186/s12989-023-00555-5), 2023-11-23

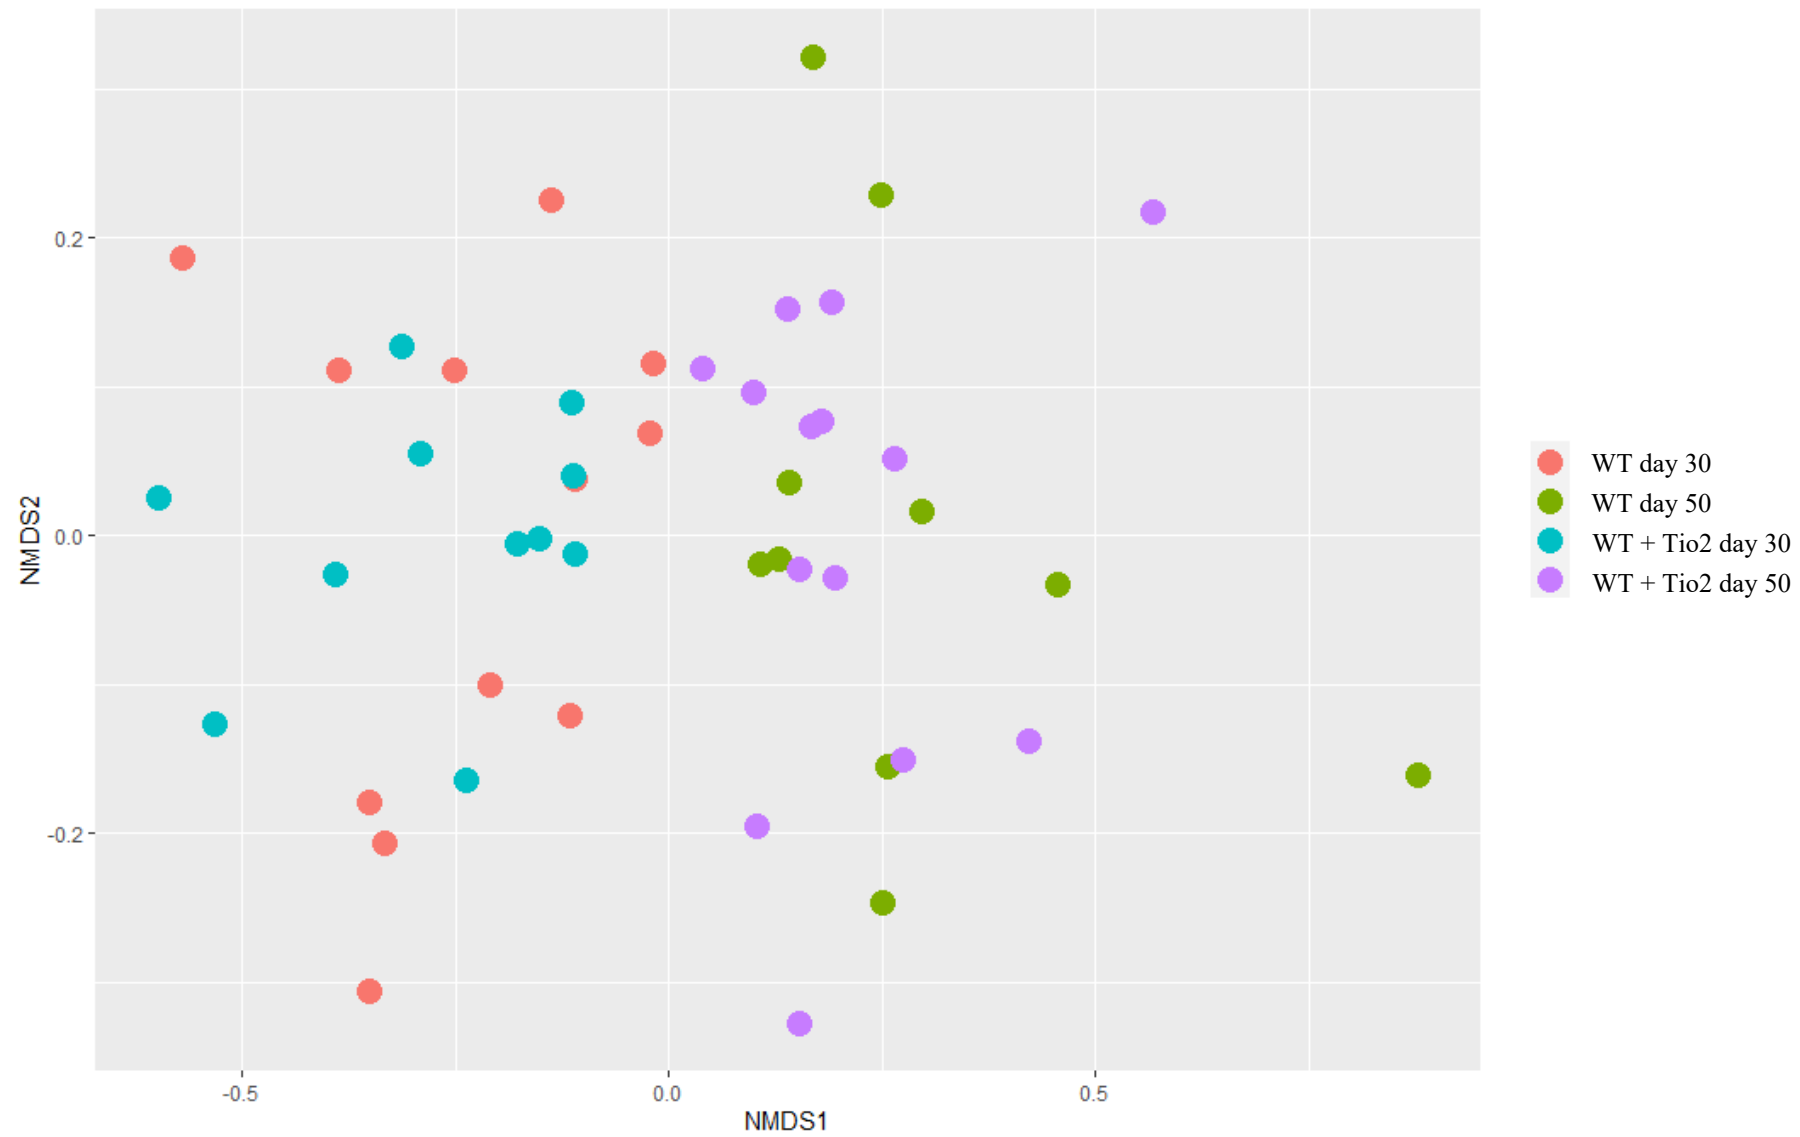

Supplement: 12989_2023_555_MOESM10_ESM.pdf [file 12989_2023_555_MOESM10_ESM.pdf]
