# Supplementary material for: Perinatal foodborne titanium dioxide exposure-mediated dysbiosis predisposes mice to develop colitis through life
Source: PubMed Central journal article supplement (PMC10666382; doi:10.1186/s12989-023-00555-5), 2023-11-23
Supplement: 12989_2023_555_MOESM11_ESM.pdf [file 12989_2023_555_MOESM11_ESM.pdf]

| <b>Genes</b>                                                                | <b>Forward 5'-3'</b>      | <b>Reverse 3'- 5'</b>    |
|-----------------------------------------------------------------------------|---------------------------|--------------------------|
| Mucin 2 ( <i>Muc2</i> )                                                     | CTGTTTTCCCCGTCTGTGGTT     | CTCTGCCTGCTGGCTTTCAT     |
| Mucin 3 ( <i>Muc3</i> )                                                     | CTGTAGTGTGGGGTGCTGAC      | TGACTGCCGAGACTCCTACA     |
| Mucin 4 ( <i>Muc4</i> )                                                     | CCCTCACTACATGGGGACAC      | TGGCTACAAAGGCTACCACC     |
| Trefoil Factor 3 ( <i>Tff3</i> )                                            | GGAGCCTGGACAGCTTCAAA      | ACGTTGGCCTGTCTCCAAG      |
| Tight junction protein 1 ( <i>Tjp1</i> )                                    | ACCCGAAACTGATGCTGTGGATAG  | AAATGGCCGGGCAGAACTTGTGTA |
| Tight junction protein 2 ( <i>Tjp2</i> )                                    | TGCAATTCCAAATCCAAACC      | GTGATTTTCTCAACCCGGA      |
| Occludin ( <i>Ocl</i> )                                                     | TTCTCCCGCAACTGGCATC       | GAGTGAAGAGTACATGGCTGCT   |
| Claudin 2 ( <i>Cldn2</i> )                                                  | AGGCATCTAGAAAACGGAGCC     | GGACCTAGTCCTTGTCCTCCA    |
| Myosin Light Chain Kinase ( <i>Mylk</i> )                                   | CTCACTGGTCTGAGCATCGTC     | AATTCATCGTCTCGCCCAA      |
| CD44                                                                        | GGAGTACTTGCAACAGGCATCT    | ACGAGTGCAACTACAGCCTT     |
| Leucine-rich repeat-containing G-protein coupled receptor 5 ( <i>Lgr5</i> ) | CAAGGTCCCGCTCATCTTGA      | CAGTGTGTGCATTTGGGGG      |
| Olfactomedin-4 (OLFM4)                                                      | CAGCTGCCTGGTTGCCTCCG      | GGCAGGTCCCATGGCTGTCC     |
| SPARC-related modular calcium-binding protein 2 ( <i>Smoc2</i> )            | GCAGGGAAAGCAGATGATGC      | CTCGGTCCAGAGTGTAGGGT     |
| Achaete-scute family bHLH transcription factor 2 ( <i>Ascl2</i> )           | GCCTACTCGTCGGAGGAA        | CCAACTGGAAAAGTCAAGCA     |
| Musashi RNA-binding protein 1 ( <i>Musashi</i> )                            | CGAGCTCGACTCCAAAACAAT     | GGCTTTCTTGCATTCCACCA     |
| Telomerase reverse transcriptase ( <i>Tert</i> )                            | GGAGTACTTGCAACAGGCATCT    | ACGAGTGCAACTACAGCCTT     |
| B lymphoma Mo-MLV insertion region 1 homolog ( <i>Bml1</i> )                | TCCCCACTTAATGTGTGTCTCT    | CTTGCTGGTCTCCAAGTAACG    |
| Homeodomain-only protein X ( <i>Hopx</i> )                                  | TCTCCATCCTTAGTCAGACGC     | GGGTGCTTGTGACCTTGTT      |
| <i>Wnt3A</i>                                                                | AATGTCCTCACTACAGCCGC      | TGTTCTGGACAAAGCCACCC     |
| <i>Wnt5A</i>                                                                | GGGTTATTCATACCTAGAGACCACC | GCTGCAACAGACTGGAGAGG     |
| <i>Il1b</i>                                                                 | ACCTTCCAGGATGAGGACATGAG   | CATCCCATGAGTCACAGAGGATG  |
| <i>Il6</i>                                                                  | CTCTGCAAGAGACTTCCATCCAGT  | CGTGGTTGTCACCAGCATCA     |
| <i>Il10</i>                                                                 | AGGCGCTGTCATCGATTCTC      | TGCTCCACTGCCTTGCTCTTA    |
| <i>Il12b</i>                                                                | GAGTCTCTGCCTCTCTCGC       | ATGAGGAGCTGGCTTGGTC      |
| <i>Il22</i>                                                                 | AGGTGGTGCCTTTCCTGACC      | ACCGCTGATGTGACAGGAGC     |
| <i>Il23</i>                                                                 | TGCAGCTTTGTACAGGTCA       | CTGTACCTGCCTGCTCTGTC     |
| <i>Tnfa</i>                                                                 | AATGGCCTCCCTCTCATCAG      | GCTACGACGTGGGCTACAGG     |
| <i>Ifng</i>                                                                 | CAGCAACAGCAAGGCCGAAA      | AGCTCATTGAATGCTTGGCG     |
| <i>Gapdh</i>                                                                | TGTAGACCATGTAGTTGAGGTCA   | AGGTCGGTGTGAACGGATTTG    |
